# Supplementary material
Source: Research Square preprint supplement (doi:10.21203/rs.3.rs-9624196/v1)
Supplement: Supplementary file 1 [file 7796545a874c72197079b7da.docx]

**Supplementary Material**

The Influence of Structural Changes in phosphonamide Flame Retardant on the Properties of Thermoplastic Polyurethane Elastomers

Kai Wei, Yingxin Li, Yajun Chen*

College of Advanced Materials and Future Technology, Beijing Technology and Business University, Beijing, 100048, China

*Corresponding author.

E-mail address: chenyajun@th.btbu.edu.cn (Yajun. Chen),

**Table S1** TG and DTG data of TPU, TPU/PPDA, TPU/PPNDB, and TPU/DAPPO composites under a nitrogen (N₂) atmosphere.

| Samples | *T*d,1% (℃) | *T*max,1 (℃) | *T*max,2 (℃) | R700, cal (%) | R700℃ (%) |
| --- | --- | --- | --- | --- | --- |
| TPU | 302 | 335 | 428 | 10.0 | 10.0 |
| TPU/PPDA-3 | 293 | 324 | 434 | 10.7 | 11.4 |
| TPU/PPDA-6 | 283 | 320 | 431 | 11.6 | 11.1 |
| TPU/PPDA-9 | 290 | 314 | 430 | 12.3 | 14.0 |
| TPU/PPDA-12 | 271 | 304 | 428 | 13.1 | 14.9 |
| TPU/PPNDB-3 | 234 | 331 | 422 | 9.9 | 10.0 |
| TPU/PPNDB-6 | 230 | 322 | 423 | 9.8 | 10.1 |
| TPU/PPNDB-9 | 206 | 311 | 427 | 9.7 | 10.1 |
| TPU/PPNDB-12 | 165 | 275 | 429 | 9.5 | 9.9 |
| TPU/DAPPO-3 | 293 | 324 | 428 | 9.9 | 10.7 |
| TPU/DAPPO-6 | 273 | 324 | 400 | 9.9 | 9.8 |
| TPU/DAPPO-9 | 257 | 318 | 425 | 10.4 | 10.7 |
| TPU/DAPPO-12 | 252 | 299 | 429 | 9.7 | 12.2 |
